# Supplementary material for: Enhancement of single-atom catalytic activity by the synergistic effect of interlayer charge transfer and magnetic coupling in an electride-based heterostructure
Source: Royal Society of Chemistry journal article supplement (doi:10.1039/d4cp03455d), 2024-01-01
Supplement: d4cp03455d1.pdf [file d4cp03455d1.pdf]

## Supplementary Information

### **Enhancement of single-atom catalytic activity by interlayer charge transfer and magnetic coupling synergistic in electrone-based heterostructure**

Jiahui Tang, Xiaocha Wang, Baozeng Zhou\*

*Tianjin Key Laboratory of Film Electronic & Communicate Devices, School of Integrated Circuit Science and Engineering, Tianjin University of Technology, Tianjin 300384, China*

\*Corresponding Authors

[baozeng@tju.edu.cn](mailto:baozeng@tju.edu.cn) (B. Zhou)

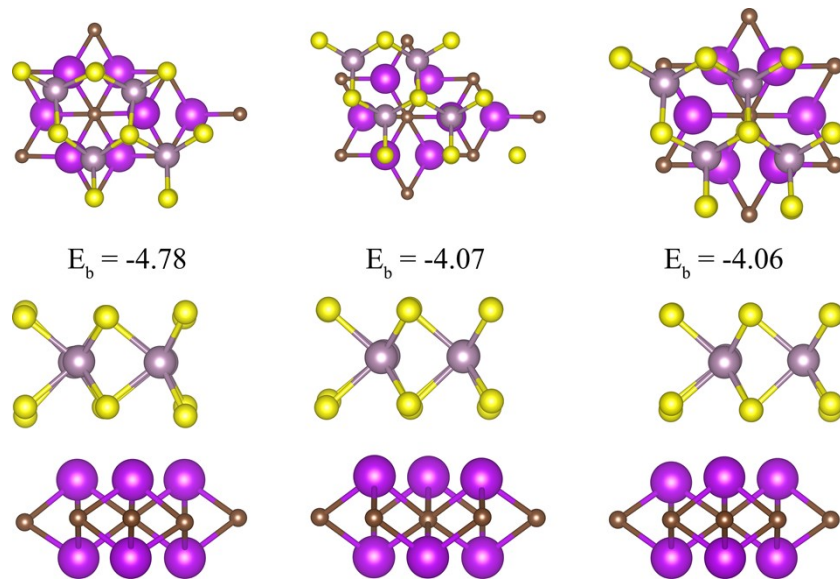

**Fig. S1** The structure of MoS<sub>2</sub>/Gd<sub>2</sub>C heterostructures.  $E_b$  is the binding energy of each structure.

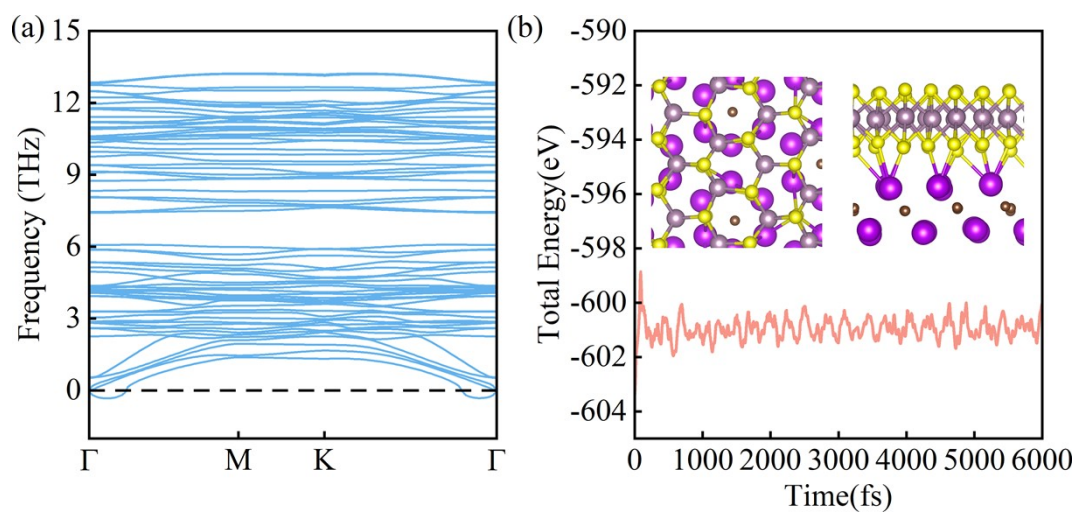

**Fig. S2** (a) Phonon dispersions of MoS<sub>2</sub>/Gd<sub>2</sub>C heterostructure and (b) The fluctuations of energy and the final configuration of MoS<sub>2</sub>/Gd<sub>2</sub>C heterostructure obtained from AIMD simulation.

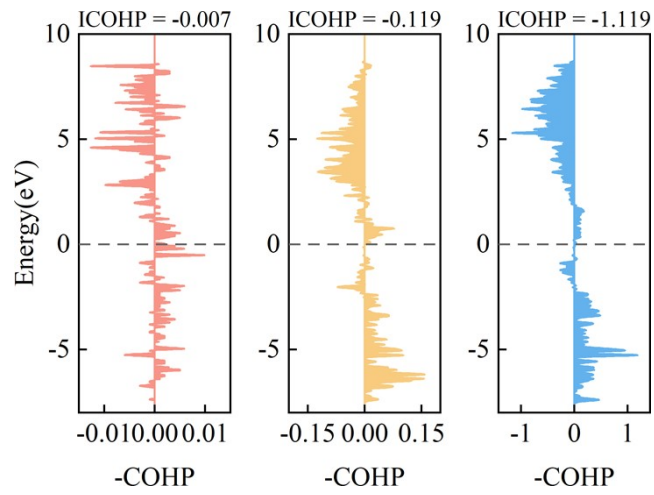

**Fig. S3** The  $-COHP$  between Gd atom and three nearest-neighbor S atoms at the interface of  $MoS_2/Ca_2N$  heterostructure.

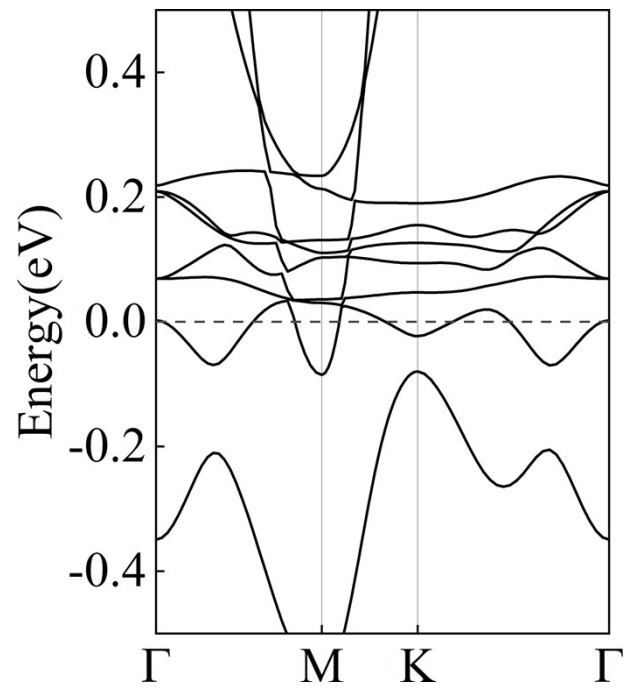

**Fig. S4** The band structure of Gd<sub>2</sub>C with both correlation effect and SOC.

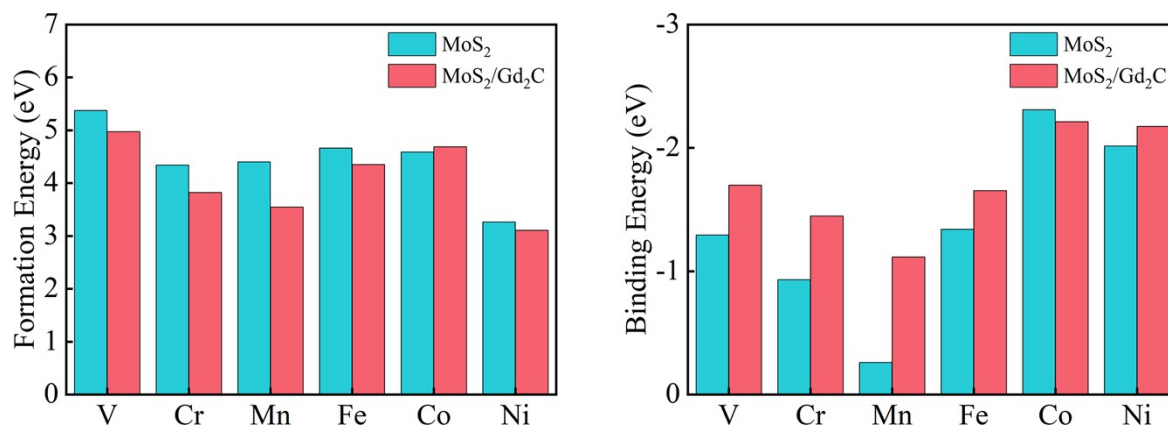

**Fig. S5** (a) The formation energy and (b) the binding energy of TM atoms in the catalyst.

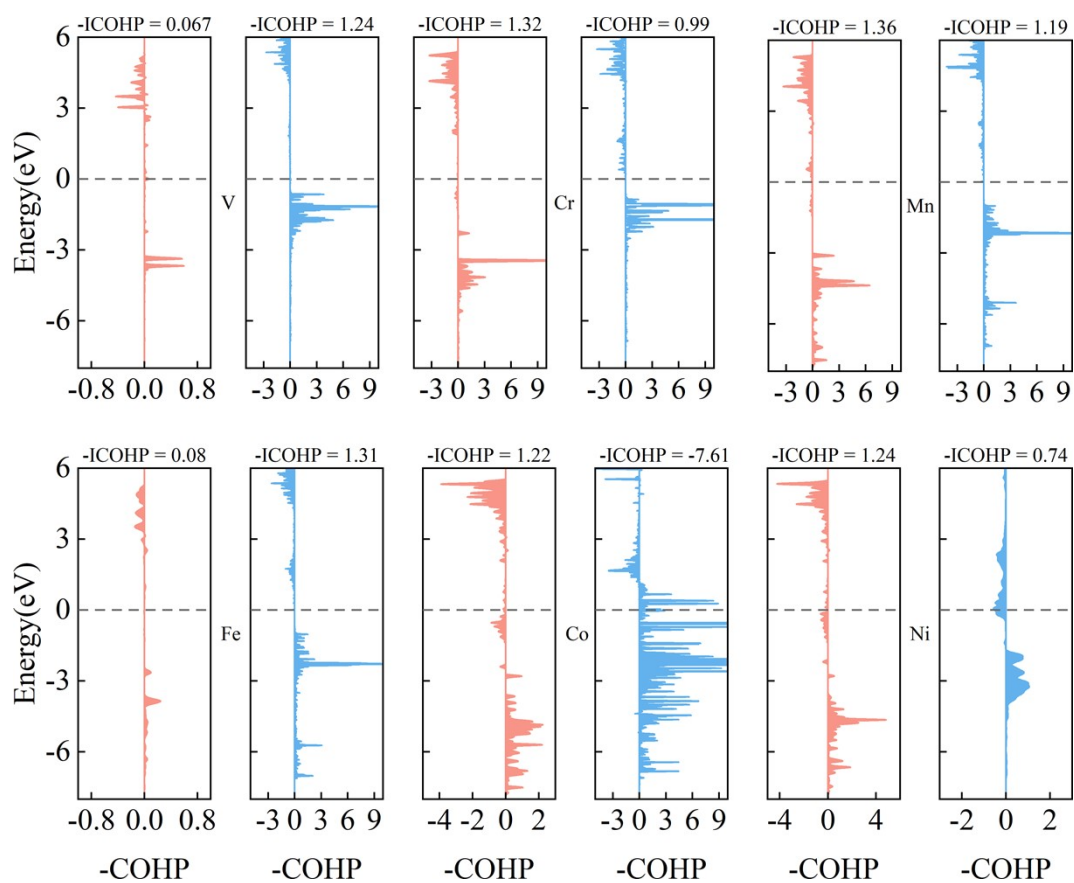

**Fig. S6** The  $-\text{COHP}$  between the TM atom on  $\text{MoS}_2$  and  $\text{MoS}_2/\text{Gd}_2\text{C}$  heterostructure and H atom.

**Table S1** Adsorption energy and catalytic performance of MoS<sub>2</sub>/Gd<sub>2</sub>C with and without SOC.

|                                          | total    | slab     | E <sub>ads</sub> | ΔG    | ΔG <sub>H</sub> |
|------------------------------------------|----------|----------|------------------|-------|-----------------|
| MoS <sub>2</sub> /Gd <sub>2</sub> C      | -617.146 | -615.100 | 1.250            | 0.390 | 1.641           |
| MoS <sub>2</sub> /Gd <sub>2</sub> C +SOC | -626.627 | -624.502 | 1.260            | 0.385 | 1.645           |



**Table. S2** The energy corresponds to different magnetic moment orientations. The magnetic moment orientation of Co and Ni is not taken into consideration in this work due to their almost negligible magnetic moments.

| orientation  | V       | Cr      | Mn      | Fe      | Co      | Ni      |
|--------------|---------|---------|---------|---------|---------|---------|
| Parallel     | -619.55 | -621.08 | -620.76 | -619.20 | -617.66 | -617.69 |
| Antiparallel | -619.56 | -621.09 | -620.74 | -619.21 | ——      | ——      |

**Table. S3** (a) The d-band center of TM atoms in the catalyst.

| d-band center                          | V      | Cr     | Mn     | Fe     | Co     | Ni     |
|----------------------------------------|--------|--------|--------|--------|--------|--------|
| TM-MoS <sub>2</sub>                    | -0.483 | -1.226 | -1.565 | -1.539 | -1.592 | -1.237 |
| TM-MoS <sub>2</sub> /Gd <sub>2</sub> C | -0.895 | -1.571 | -2.274 | -1.346 | -1.696 | -2.331 |

**Table. S4** The energy consumptions of each reaction step and overpotential in MoS<sub>2</sub>.

| atom | $\Delta G_1$ | $\Delta G_2$ | $\Delta G_3$ | $\Delta G_4$ | Overpotential (eV) |
|------|--------------|--------------|--------------|--------------|--------------------|
| V    | -0.649       | 0.230        | 3.064        | 2.275        | 1.834              |
| Cr   | 0.077        | 1.609        | 0.489        | 2.745        | 1.515              |
| Mn   | 1.401        | -0.044       | 1.227        | 2.335        | 1.105              |
| Fe   | -0.083       | 1.238        | 1.910        | 1.855        | 0.680              |
| Co   | -0.175       | 1.340        | 2.087        | 1.67         | 0.857              |
| Ni   | 0.762        | 1.439        | 1.744        | 0.976        | 0.514              |

**Table. S5** The energy consumptions of each reaction step and overpotential in MoS<sub>2</sub>/Gd<sub>2</sub>C.

| atom | $\Delta G_1$ | $\Delta G_2$ | $\Delta G_3$ | $\Delta G_4$ | Overpotential (eV) |
|------|--------------|--------------|--------------|--------------|--------------------|
| V    | -0.898       | 0.654        | 3.294        | 1.870        | 2.064              |
| Cr   | 0.027        | 1.228        | 2.261        | 1.404        | 1.031              |
| Mn   | -0.670       | 1.763        | 1.772        | 2.054        | 0.824              |
| Fe   | -0.539       | 1.692        | 2.315        | 1.452        | 1.085              |
| Co   | -0.348       | 1.372        | 2.045        | 1.851        | 0.815              |
| Ni   | 0.847        | 1.407        | 1.752        | 0.914        | 0.522              |
